# Supplementary material for: Structure of the HIV immature lattice allows for essential lattice remodeling within budded virions
Source: eLife. 2023 Jul 12;12:e84881. doi: 10.7554/eLife.84881 (PMC10361719; doi:10.7554/eLife.84881)
Supplement: Figure 1—source data 1. — Binding site positions, binding radius, and binding angles of the coarse model in Figure 1. [file elife-84881-fig1-data1.xlsx]

## Sheet: Sheet1
	Source Data Fig 1. The binding sites positions, binding radius, and binding angles of the coarse model in Fig 1. The position of center-of-mass (COM) is [0,0,0] nm.
	MA domain (nm)	[-0.08, -0.004, 1.998]
	Dimerization site (nm)	[-1.01, -1.244, -1.175]
	Hexamerization site 1 (nm)	[1.277, -1.009, -2.087]
	Hexamerization site 2 (nm)	[1.095, 0.313, -2.12]
	MA-Membrane binding radius (nm)	1
	Dimerization binding radius (nm)	2.21
	Hexamerization binding radius (nm)	0.42
	Dimerization binding angles	[2.168, 2.168, -2.005, -2.005, -1.723]	The 5 listed angles are in order:
			are the angles between the binding radius and the site-to-COM vector.
	Hexamerization binding angles	[2.21, 1.459, 2.443, 1.55, 0.879]	are dihedral angles that orient a second axis of each molecule relative to the binding radius.
			is a dihedral angle between the site-to COM vectors around the binding radius. Equations are in ref: (Varga et al, Biophys J. 2020).
	MA-membrane binding angles	[𝜋, 𝜋, -,-,-]
